# Supplementary material
Source: PubMed Central journal article supplement (PMC1796776)
Supplement: 7400881-s1.pdf [file 7400881-s1.pdf]

## Supplementary Information

### Supplementary results

Aconitase activity was reduced by approximately 50% in the lysine and quadruple alanine substitution mutants, and cytochrome c oxidase activity was about 60% of that of wild-type (Supplementary Table 2)

### Supplementary methods

The mutations were obtained by PCR amplification of a *PvuII* fragment of the *YFH1* gene inserted in the pGEM vector using oligonucleotides containing the required base substitutions. The mutated fragment was cleaved by *PvuII* and substituted for the wild-type fragment in the pFL39/YFH1 plasmid. The mutagenized DNA inserts were entirely sequenced.

**Supplementary Table 1. Phenotype of published frataxin mutants in the acidic ridge.**

| Organism                     | Mutation        | <i>In vitro</i> phenotype |                              |                          | <i>In vivo</i> phenotype |                  |                  |                    | Reference            |
|------------------------------|-----------------|---------------------------|------------------------------|--------------------------|--------------------------|------------------|------------------|--------------------|----------------------|
|                              |                 | Iron binding* (%)         | Aggregation <sup>#</sup> (%) | Ferroxidase <sup>‡</sup> | Cell growth <sup>§</sup> | Oxidative damage | Isu1 interaction | Aconitase activity |                      |
| <i>E. coli</i><br>CyaY       | E18A/E33S       | 19 (2)                    | 11                           |                          | Not tested               | Not tested       | Not tested       | Not tested         | Adinolfi et al, 2002 |
|                              | E18K/E19K/D22K  | 18 (1)                    | 0                            |                          |                          |                  |                  |                    |                      |
| <i>S. cerevisiae</i><br>Yfh1 | D86N/E90Q/E93Q  | Low                       | 0                            | Not tested               | wt                       | Not tested       | Not tested       | Not tested         | Aloria et al, 2004   |
|                              | D86A/E90A/E93A  |                           | 0                            |                          | wt                       |                  | Yes              | wt                 |                      |
|                              | D78N/D82N/E89Q  | Not tested                | Not tested                   |                          | wt                       |                  | Not tested       | Not tested         |                      |
|                              | D79N/D86N/E90Q  | Not tested                | Not tested                   |                          | wt                       |                  | Not tested       | Not tested         |                      |
|                              | E71A/E75A/E76A  | 96                        | Not tested                   | wt                       | wt                       | Not tested       | Not tested       | Not tested         | Gakh et al, 2006     |
|                              | D79A/D82A       | 95                        | wt                           | Decreased                | wt                       | Increased        | wt               |                    |                      |
|                              | E93A            | 49                        | 42                           | wt                       | wt                       | Increased        | Not tested       |                    |                      |
|                              | E93A/D97A/E103A | 23                        | 36                           | wt                       | wt                       | Increased        | wt               |                    |                      |

\*Bound iron in mutants is expressed as percent of iron bound to wild-type CyaY monomer, Yfh1 aggregates and CyaY aggregates(brackets)

<sup>#</sup>Aggregation is expressed as the percentage of aggregated frataxin in the total frataxin. Under the experimental conditions used by the authors percent of aggregation was 60% for wild-type CyaY and 68% for wild-type Yfh1.

<sup>‡</sup>Ferroxidase activity has not been detected in CyaY.

<sup>§</sup>wt, wild-type.

**Supplementary Table 2. Aconitase and cytochrome c oxidase activities in *yfh1* mutants**

| Strain                | Aconitase*       | Cytochrome c oxidase <sup>#</sup> |
|-----------------------|------------------|-----------------------------------|
| Wild-type             | 625              | 6.6                               |
| D86A/E89A             | 620              | 6.9                               |
| D86K/E89K             | 321 <sup>‡</sup> | 4.3                               |
| D86A/E89A/D101A/E103A | 246 <sup>‡</sup> | 4.8                               |

The activities were measured in mitochondria of raffinose grown cells.

\*Aconitase activity is measured by following conversion of citrate to isocitrate at 240 nm and is expressed in nmol isocitrate/min/mg protein.

<sup>#</sup>Cytochrome c oxidase activity is expressed in  $\mu$ M cytochrome c reduced/min/mg protein.

<sup>‡</sup>These values are not considered as significantly different.

**Supplementary Table 3. Phenotypes of *yfh1* mutants in this study**

| Mutation              | CyaY equivalent    | *Growth + FeSO <sub>4</sub> | *Growth + H <sub>2</sub> O <sub>2</sub> | Aconitase activity | Isu1 interaction |
|-----------------------|--------------------|-----------------------------|-----------------------------------------|--------------------|------------------|
| Wild-type             |                    | +                           | +                                       | High               | Strong           |
| D86K                  | E19                | +                           | +/-                                     | High               | Not tested       |
| E89K                  | D22                | +/-                         | +/-                                     | Slightly decreased | Decreased        |
| D101A                 | D31                | +                           | +/-                                     | High               | Not tested       |
| D86A/E89A             | E19, D22           | +                           | +/-                                     | High               | Not tested       |
| D86K/E89K             | E19, D22           | -                           | -                                       | Low                | Low              |
| D101A/E103A           | D31, E33           | +                           | +/-                                     | Not tested         | Not tested       |
| D101K/E103K           | D31, E33           | -                           | -                                       | Low                | Not tested       |
| D86A/E89A/D101A/E103A | E19, D22, D31, E33 | -                           | -                                       | Low                | Low              |

\*Cellular growth is wild-type (+), slightly decreased (+/-), or strongly inhibited (-).

Supplementary data to Figure 4

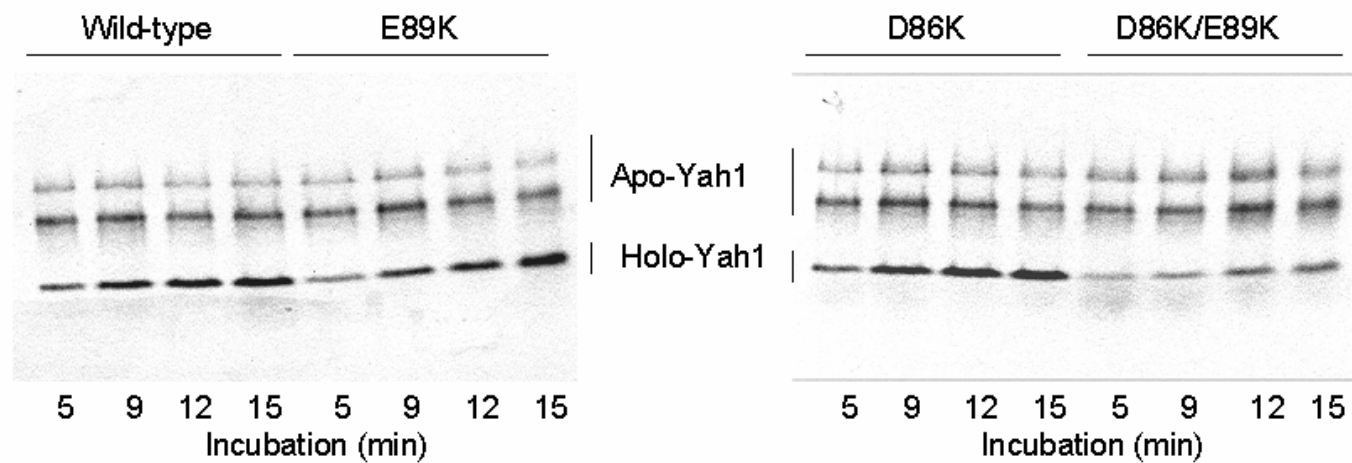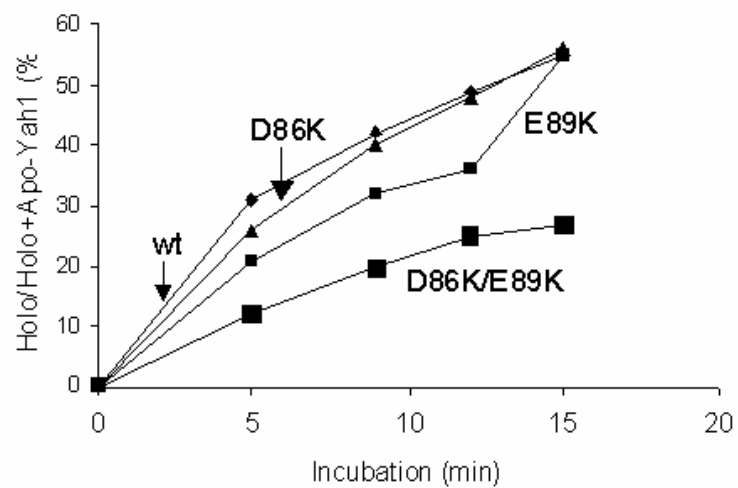

Figure 4
